# Supplementary material for: A CsCl-type inorganic cluster-based high-symmetry crystal built from {Mo4.55V7.45PO40}10.45− with a high ratio of vanadium to molybdenum and {(H2O)0.3@K6(H2O)12}6+ clusters exhibiting proton conduction below the freezing point of water
Source: Royal Society of Chemistry journal article supplement (doi:10.1039/c9dt03960k), 2019-01-01
Supplement: c9dt03960k1.pdf [file c9dt03960k1.pdf]

**CsCl-type inorganic cluster-based high-symmetry crystal built from  $\{\text{Mo}_{4.55}\text{V}_{7.45}\text{PO}_{40}\}^{10.45-}$  with high ratio of vanadium to molybdenum and  $\{(\text{H}_2\text{O})_{0.3}@\text{K}_6(\text{H}_2\text{O})_{12}\}^{6+}$  clusters exhibiting proton conduction below the freezing point of water**

Zhi-Yuan Yao,<sup>a</sup> Guo-Qin Zhang,<sup>a</sup> Jian-Lan Liu,<sup>\*a</sup> Jin Zhang,<sup>a</sup> Wen-Long Liu,<sup>b</sup> Xiao-Ming Ren<sup>\*a,c,d</sup>

<sup>a</sup> State Key Laboratory of Materials-Oriented Chemical Engineering and College of Chemistry and Molecular Engineering, Nanjing Tech University, Nanjing 211816, P. R. China

<sup>b</sup> College of Chemistry and Chemical Engineering, Yangzhou University, Yangzhou 225002, P. R. China

<sup>c</sup> College of Materials Science and Engineering, Nanjing Tech University, Nanjing 211816, P. R. China

<sup>d</sup> State Key Laboratory of Coordination Chemistry, Nanjing University, Nanjing 210023, P. R. China

Email: [xmren@njtech.edu.cn](mailto:xmren@njtech.edu.cn)

## Contents

**Figure S1:** (a, b) SEM images of nanocrystals of **1** at different magnifications (c) EDS images of nanocrystals of **1** (d) PXRD patterns of microcrystals and nanocrystals.

**Figure S2:** EPR spectrum of **1** at ambient temperature.

**Figure S3:** (a) the structure of  $\{\text{Mo}_{4.55}\text{V}_{7.45}\text{PO}_{40}\}^{10.45-}$  polyoxoanion (b)  $(\text{H}_2\text{O})_{0.3}@\text{K}_6(\text{H}_2\text{O})_{12}$  cluster wherein the center  $\text{H}_2\text{O}$  molecule is eclipsed by  $\text{K}^+$  ion (c)  $\text{K}_6(\text{H}_2\text{O})_{12}$  cluster wherein the green ball shows the cavity of cluster in **1** (d) the polyoxoanion (cyan ball) and the twenty-four nearest neighboring  $\text{K}^+$  ions.

**Figure S4:** (a) Experimental PXRD pattern of microcrystals and simulated one for **1** (b) TG and its derivative plots of **1** in 303-1068 K.

**Figure S5:** Experimental and fitted impedance spectra of **1** at the selected temperatures (Inset: the equivalent circuit).

**Table S1:** Selected bond lengths ( $\text{\AA}$ ) in **1**.

**Table S2:** Proton-conductivity of POMs around room temperature.

## References

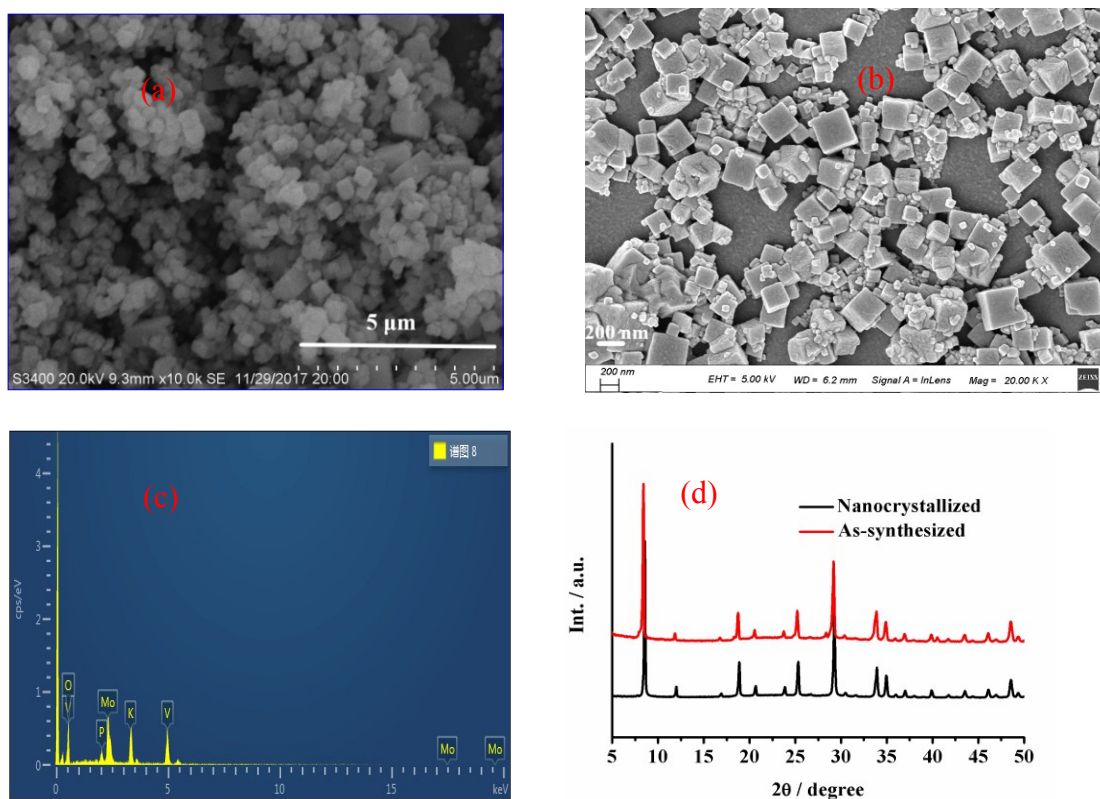

Figure S1: (a, b) SEM images of nanocrystals of **1** at different magnifications (c) EDS images of nanocrystals of **1** (d) PXRD patterns of microcrystals and nanocrystals.

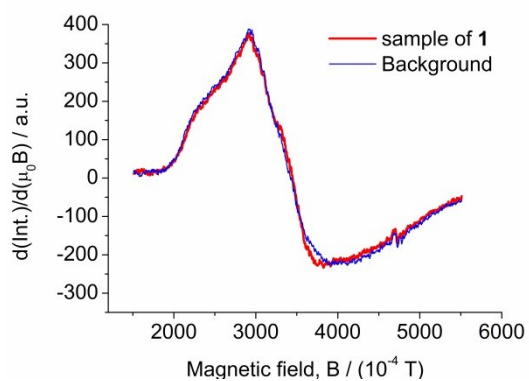

Figure S2: EPR spectrum of **1** at ambient temperature.

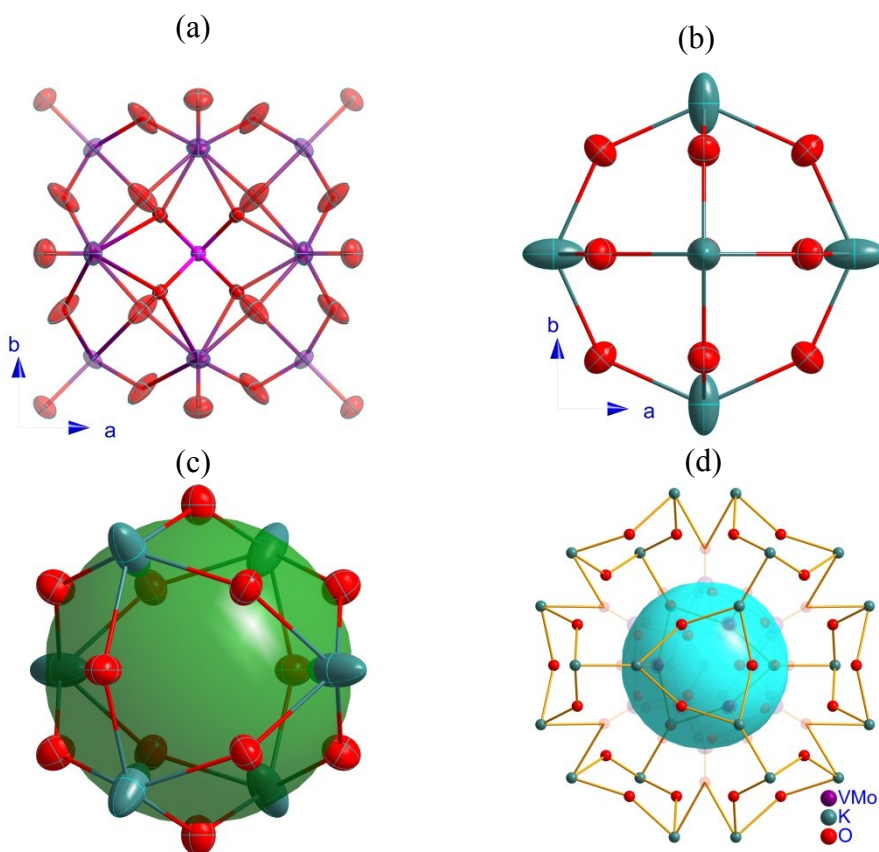

Figure S3: (a) the structure of  $\{\text{Mo}_{4.55}\text{V}_{7.45}\text{PO}_{40}\}^{10.45-}$  polyoxoanion (b)  $(\text{H}_2\text{O})_{0.3}@\text{K}_6(\text{H}_2\text{O})_{12}$  cluster wherein the center  $\text{H}_2\text{O}$  molecule is eclipsed by  $\text{K}^+$  ion (c)  $\text{K}_6(\text{H}_2\text{O})_{12}$  cluster wherein the green ball shows the cavity of cluster in **1** (d) the polyoxoanion (cyan ball) and the twenty-four nearest neighboring  $\text{K}^+$  ions.

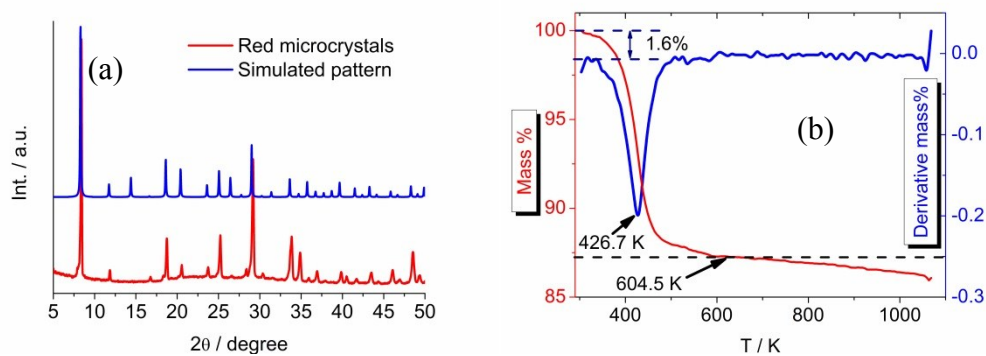

Figure S4: (a) Experimental PXRD pattern of microcrystals and simulated one for **1** (b) TG and its derivative plots of **1** in 303-1068 K.

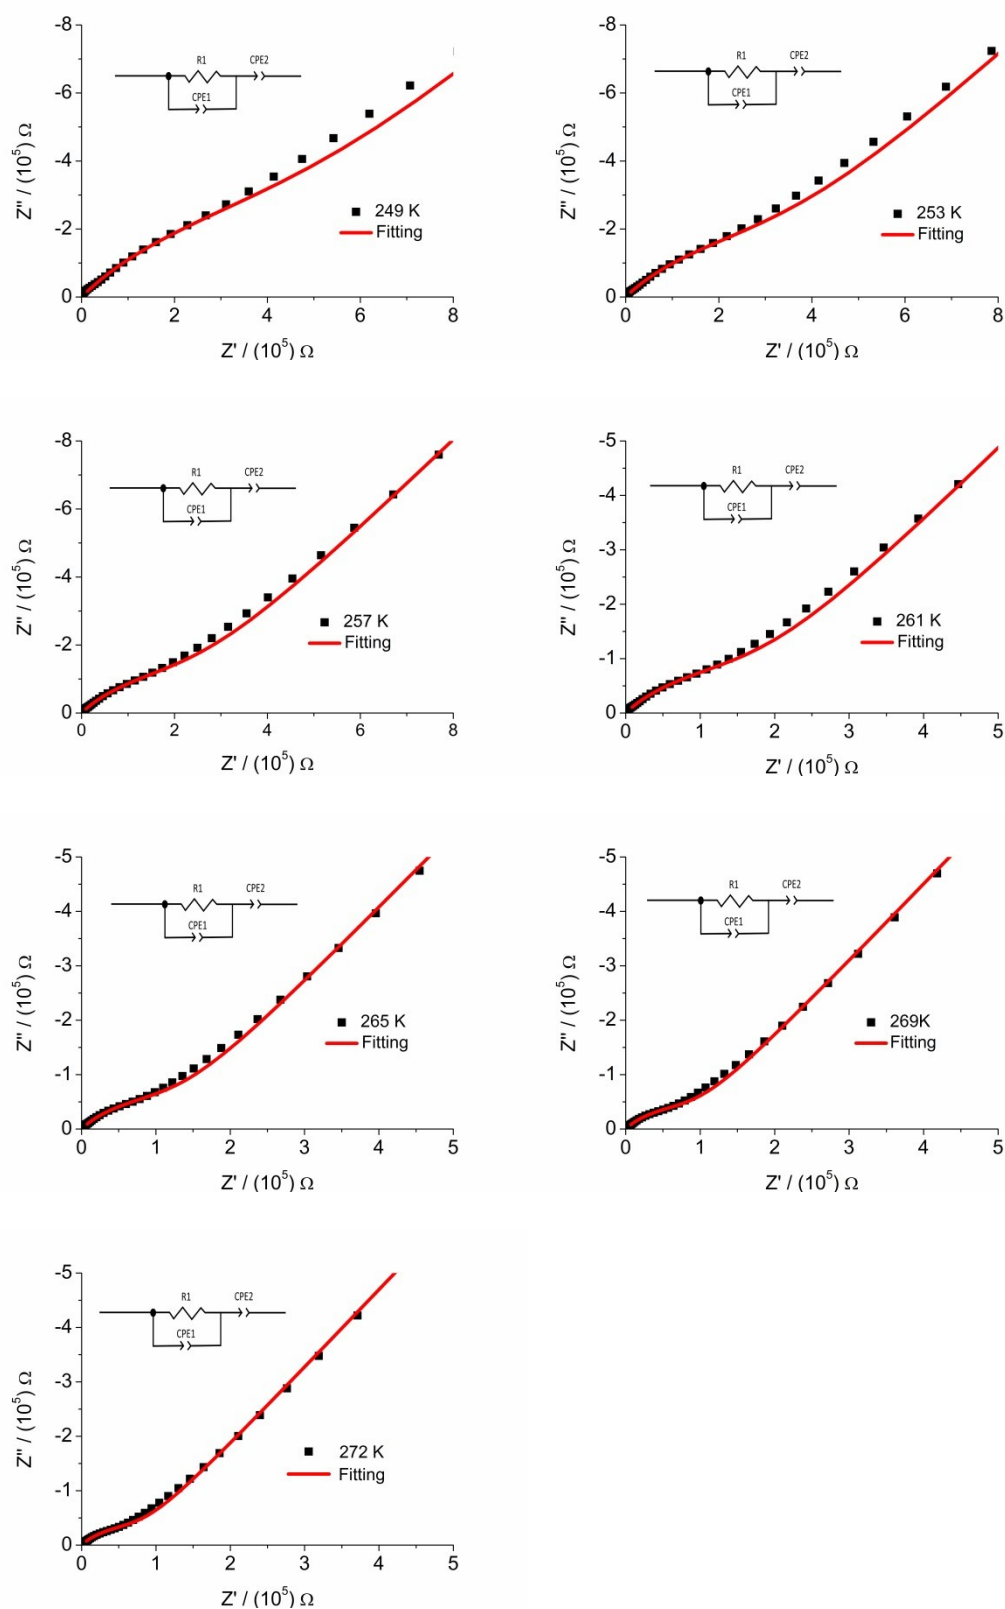

Figure S5: Experimental and fitted impedance spectra of **1** at the selected temperatures (Inset: the equivalent circuit).

Table S1: Selected bond lengths (Å) in **1**

|           |           |         |           |          |         |
|-----------|-----------|---------|-----------|----------|---------|
| MoV1-O1   | 2.412(14) | K1-O3#4 | 2.911(15) | P1-O1#1  | 1.57(3) |
| MoV1-O1#1 | 2.412(14) | K1-O3#5 | 2.911(15) | P1-O1#10 | 1.57(3) |
| MoV1-O2   | 1.894(5)  | K1-O3#6 | 2.911(15) | P1-O1#11 | 1.57(3) |
| MoV1-O2#2 | 1.894(5)  | K1-O4   | 2.793(12) | P1-O1#12 | 1.57(3) |
| MoV1-O2#1 | 1.894(5)  | K1-O4#7 | 2.793(12) | P1-O1#13 | 1.57(3) |
| MoV1-O2#3 | 1.894(5)  | K1-O4#8 | 2.793(12) | P1-O1#14 | 1.57(3) |
| MoV1-O3   | 1.599(13) | K1-O4#9 | 2.793(12) | P1-O1#15 | 1.57(3) |
| K1-O3     | 2.911(15) | P1-O1   | 1.57(3)   |          |         |

Symmetry codes: #1 =x, -y, z; #2 = y, -z, x; #3 = y, z, x; #4 = x, y, -z+1; #5 = -x+1, -y, -z+1; #6 = -x+1, -y, z; #7 = z, x, y; #8 = -x+1, y, -z+1; #9 = z, x, -y+1; #10 = -x, y, -z; #11 = -x, y, z; #12 = -x, -y, z; #13 = x, y, -z; #14 = -x, -y, -z; #15 = x, -y, -z.

Table S2: Proton-conductivity of POMs around room temperature

| Compounds                                                                                                                                                                                                                                                               | Conductivity<br>(S cm <sup>-1</sup> ) | Temperature / humidity | Ref. |
|-------------------------------------------------------------------------------------------------------------------------------------------------------------------------------------------------------------------------------------------------------------------------|---------------------------------------|------------------------|------|
| [Sm(H <sub>2</sub> O) <sub>5</sub> (CO <sub>2</sub> CH <sub>2</sub> NH <sub>3</sub> ) <sub>2</sub> ][Al(OH) <sub>6</sub> Mo <sub>6</sub> O <sub>18</sub> ]·10H <sub>2</sub> O                                                                                           | 4.85 × 10 <sup>-6</sup>               | T = 25 °C,<br>95% RH   | 1    |
| [Co(H <sub>2</sub> O) <sub>8</sub> ][H(H <sub>2</sub> O) <sub>2.5</sub> ](HINO) <sub>4</sub> (PMo <sub>12</sub> O <sub>40</sub> )                                                                                                                                       | 9.0 × 10 <sup>-9</sup>                | T = 25 °C,<br>35% RH   | 2    |
| [N(CH <sub>3</sub> ) <sub>4</sub> ] <sub>1.5</sub> K <sub>5.5</sub> Na <sub>2</sub> [I <sub>3</sub> C(Mo <sup>V</sup> <sub>2</sub> O <sub>2</sub> S <sub>2</sub> ) <sub>8</sub> (Se <sup>IV</sup> O <sub>3</sub> ) <sub>8</sub> (OH) <sub>8</sub> ]·25 H <sub>2</sub> O | 6.06 × 10 <sup>-4</sup>               | T = 20 °C,<br>97% RH   | 3    |
| Na <sub>5</sub> [H <sub>7</sub> {N(CH <sub>2</sub> PO <sub>3</sub> ) <sub>3</sub> }Mo <sub>6</sub> O <sub>16</sub> (OH)(H <sub>2</sub> O) <sub>4</sub> ] <sub>4</sub> ·18H <sub>2</sub> O                                                                               | 7.58 × 10 <sup>-4</sup>               | T = 30 °C,<br>98% RH   | 4    |
| [H <sub>2</sub> en] <sub>4</sub> [Ni <sub>5</sub> (OH) <sub>3</sub> (trzS) <sub>3</sub> (en)(H <sub>2</sub> O)(B-α-PW <sub>9</sub> O <sub>34</sub> )]·6H <sub>2</sub> O                                                                                                 | 4.0 × 10 <sup>-7</sup>                | T = 25 °C,<br>98% RH   | 5    |
| H <sub>7</sub> SiW <sub>9</sub> V <sub>3</sub> O <sub>40</sub> ·9H <sub>2</sub> O                                                                                                                                                                                       | 2.05 × 10 <sup>-3</sup>               | T = 18 °C,<br>50% RH   | 6    |
| K <sub>8</sub> Na <sub>3</sub> Li <sub>5</sub> {[Na(NO <sub>3</sub> )(H <sub>2</sub> O)] <sub>4</sub> [Al <sub>16</sub> (OH) <sub>24</sub> (H <sub>2</sub> O) <sub>8</sub> (P <sub>8</sub> W <sub>48</sub> O <sub>184</sub> )] <sub>2</sub> }·66H <sub>2</sub> O        | 4.2 × 10 <sup>-3</sup>                | T = 25 °C,<br>55% RH   | 7    |
| (HIm) <sub>24</sub> (NH <sub>4</sub> ) <sub>20</sub> [Mo <sub>72</sub> <sup>VI</sup> Mo <sub>60</sub> <sup>VO</sup> O <sub>372</sub> (CH <sub>3</sub> COO) <sub>30</sub> (H <sub>2</sub> O) <sub>72</sub> ]·ca 190H <sub>2</sub> O                                      | 1.26 × 10 <sup>-6</sup>               | T = 25 °C,<br>50% RH   | 8    |
| H[La(H <sub>2</sub> O) <sub>4</sub> ] <sub>2</sub> [MnV <sub>13</sub> O <sub>38</sub> ]·9NMP·17H <sub>2</sub> O                                                                                                                                                         | 8.7 × 10 <sup>-6</sup>                | T = 25 °C,<br>75% RH   | 9    |
| H <sub>9</sub> P <sub>2</sub> W <sub>15</sub> V <sub>3</sub> O <sub>62</sub> ·28H <sub>2</sub> O                                                                                                                                                                        | 3.64 × 10 <sup>-2</sup>               | T = 26 °C,<br>75% RH   | 10   |
| [La <sub>3</sub> (H <sub>2</sub> O) <sub>22</sub> ][P <sub>2</sub> W <sub>15</sub> Ta <sub>3</sub> O <sub>62</sub> ]·nH <sub>2</sub> O                                                                                                                                  | 3.24 × 10 <sup>-4</sup>               | T = 25 °C,<br>98% RH   | 11   |
| (H <sub>2</sub> en) <sub>4</sub> H <sub>2</sub> [V <sub>12</sub> B <sub>18</sub> O <sub>54</sub> (OH) <sub>6</sub> (H <sub>2</sub> O)]·11H <sub>2</sub> O                                                                                                               | 3.44 × 10 <sup>-7</sup>               | T = 20 °C,<br>33% RH   | 12   |
| H <sub>14</sub> [Na <sub>6</sub> (H <sub>2</sub> O) <sub>12</sub> ] <sub>4</sub> [K <sub>42</sub> Ge <sub>8</sub> W <sub>72</sub> O <sub>272</sub> (H <sub>2</sub> O) <sub>60</sub> ]·solvent                                                                           | 4.3 × 10 <sup>-5</sup>                | T = 30 °C,<br>55% RH   | 13   |

## References

1. J. Miao, Y. Liu, Q. Tang, D. He, G. Yang, Z. Shi, S. Liu and Q. Wu, *Dalton Trans.*, 2014, **43**, 14749-14755.
2. M. L. Wei, P. F. Zhuang, H. H. Li and Y. H. Yang, *Eur. J. Inorg. Chem.*, 2011, 1473-1478.
3. H. Y. Zang, J. J. Chen, D. L. Long, L. Cronin and H. N. Miras, *Adv. Mater.*, 2013, **25**, 6245-6249.
4. L. Yang, P. Ma, Z. Zhou, J. Wang and J. Niu, *Inorg. Chem.*, 2013, **52**, 8285-8287.
5. G. J. Cao, J. D. Liu, T. T. Zhuang, X. H. Caia and S. T. Zheng, *Chem. Commun.*, 2015, **51**, 2048-2051.
6. N. Tian, M. Zhu, Q. Wu, W. Yan and A. B. Yaroslavtsev, *Mater. Lett.*, 2014, **115**, 165-167.
7. P. Yang, M. Alsufyani, A. H. Emwas, C. Chen and N. M. Khashab, *Angew. Chem. Int. Ed.*, 2018, **57**, 13046-13051.
8. W. J. Liu, L. Z. Dong, R. H. Li, Y. J. Chen, S. N. Sun, S. L. Li and Y. Q. Lan, *ACS Appl. Mater. Interfaces*, 2019, **11**, 7030-7036.
9. J. X. Wang, Y. D. Wang, M. J. Wei, H. Q. Tan, Y. H. Wang, H. Y. Zang and Y. G. Li, *Inorg. Chem. Front.*, 2018, **5**, 1213-1217.
10. X. Tong, X. Wu, Q. Wu, W. Zhu, F. Cao and W. Yan, *Dalton Trans.*, 2012, **41**, 9893-9896.
11. Q. Peng, S. Li, R. Wang, S. Liu, L. Xie, J. Zhai, J. Zhang, Q. Zhao and X. Chen, *Dalton Trans.*, 2017, **46**, 4157-4160.
12. X. Liu, D. Zhang, L. Li, X. Sun, L. Zhang and H. Yuan, *Dalton Trans.*, 2017, **46**, 9103-9109.
13. Z. Li, L. D. Lin, H. Yu, X. X. Li and S. T. Zheng, *Angew. Chem. Int. Ed.*, 2018, **57**, 15777-15781.
